# Supplementary material
Source: PubMed Central journal article supplement (PMC6487537)
Supplement: oc8b00879_si_001.pdf [file oc8b00879_si_001.pdf]

# Discovery of volatile biomarkers of Parkinson's disease from sebum

Drupad K Trivedi<sup>1</sup>, Eleanor Sinclair<sup>1</sup>, Yun Xu<sup>1</sup>, Depanjan Sarkar<sup>1</sup>, Camilla Liscio<sup>2</sup>, Phine Banks<sup>2</sup>, Joy Milne<sup>1</sup>, Monty Silverdale<sup>3</sup>, Tilo Kunath<sup>4</sup>, Royston Goodacre<sup>1,5</sup>, Perdita Barran\*<sup>1</sup>

<sup>1</sup>Manchester Institute of Biotechnology, School of Chemistry, The University of Manchester, Princess Street, Manchester, UK, M1 7DN

<sup>2</sup>Anatune, 4 Wellbrook Way, Girton, Cambridge, UK, CB3 0NA

<sup>3</sup>Department of Neurology, Salford Royal Foundation Trust, Manchester Academic Health Science Centre, University of Manchester, UK

<sup>4</sup>Institute for Stem Cell Research, School of Biological Sciences, The University of Edinburgh, Edinburgh UK, EH16 4UU

<sup>5</sup> Institute of Integrative Biology, University of Liverpool, Crown Street, Liverpool L69 7ZB

## Supplementary Information

**Table S1A** Details of the collecting sites in the UK and the lead PI at each site

| SITE NUMBER | SITE NAME                                          | PI                  |
|-------------|----------------------------------------------------|---------------------|
| 1           | Addenbrookes (Cambridge)                           | Paul Worth          |
| 2           | Bournemouth                                        | Khaled Amar         |
| 3           | Cornwall/Truro                                     | Christine Schofield |
| 4           | Lothian - Western General<br>Edinburgh             | Gordon Duncan       |
| 5           | Edinburgh – Royal Infirmary of<br>Edinburgh        | Gordon Duncan       |
| 6           | Edinburgh - Primary Care NHS<br>Lothian (Seb Derm) | Richard Weller      |
| 7           | Hampshire                                          | Sam Arianayagam     |
| 8           | Nottingham                                         | Gill Sare           |
| 9           | Pennine                                            | Jason Raw           |
| 10          | Salford                                            | Monty Silverdale    |
| 11          | Salisbury                                          | Diran Padiachy      |
| 12          | Sheffield                                          | Oliver Bandmann     |
| 13          | South Tees                                         | Neil Archibold      |
| 14          | Southern Health                                    | Helen Roberts       |
| 15          | Luton & Dunstable                                  | Anette Schrag       |
| 16          | Portsmouth                                         | Sean Slaght         |
| 17          | Northumbria                                        | Richard Walker      |

|    |                                                                                 |                 |
|----|---------------------------------------------------------------------------------|-----------------|
| 18 | London North West                                                               | Sophie Molloy   |
| 19 | Bath                                                                            | Veronica Lyell  |
| 20 | Gateshead                                                                       | Richard Athey   |
| 21 | Sunderland                                                                      | Uma Nath        |
| 22 | Plymouth                                                                        | Camille Carroll |
| 23 | Newcastle Upon Tyne Hospitals<br>NHS Foundation Trust (Newcastle<br>University) | Nicola Pavese   |
| 24 | Royal Devon and Exeter NHS<br>Foundation Trust                                  | Robert James    |
| 25 | Imperial College Healthcare NHS<br>Trust                                        | Sophie Molloy   |

**Table S1B:** Participant numbers and metadata per wave.

|                                  | Discovery cohort  |                      |                            |         |
|----------------------------------|-------------------|----------------------|----------------------------|---------|
|                                  | Control<br>(n=10) | Drug Naïve PD (n=10) | PD on medication<br>(n=10) | p-value |
| Age (years)                      | 64.8 ± 3.06       | 72.82 ± 8.42         | 64.67 ± 2.55               | 0.01*   |
| BMI                              | 27.10 ± 3.50      | 26.94 ± 4.08         | 25.33 ± 3.44               | 0.64    |
| Gender (M/F ratio)               | 0.84              | 1.20                 | 0.80                       | 0.88    |
| Alcohol intake (yes/no<br>ratio) | 4.5               | 0.37                 | 2                          | 0.03*   |
| Smoker                           | 1                 | 0                    | 0                          | 0.39    |
|                                  | Validation cohort |                      |                            |         |
|                                  | Control<br>(n=11) | Drug Naïve PD (n=11) | PD on medication<br>(n=9)  | p-value |
| Age (years)                      | 55.78 ± 18.87     | 75.40 ± 6.85         | 68.90 ± 11.76              | 0.02*   |
| BMI                              | 28.96 ± 11.01     | 25.74 ± 3.83         | 24.98 ± 3.54               | 1.00    |
| Gender (M/F ratio)               | 0.26              | 1.50                 | 1                          | 0.10    |
| Alcohol intake (yes/no<br>ratio) | 0.8               | 9                    | 1.5                        | 0.10    |
| Smoker                           | 0                 | 0                    | 1                          | 0.24    |

| Wave 3 (odor port validation, drug naïve PD subjects only, n=3) |              |
|-----------------------------------------------------------------|--------------|
| Age (years)                                                     | 65.66 ± 3.30 |
| BMI                                                             | 23.46 ± 1.80 |
| Gender (M/F ratio)                                              | 2            |
| Alcohol intake (yes/no ratio)                                   | 2            |
| Smoker                                                          | 0            |

\* indicates significant difference between controls, drug naïve and PD with medication groups.

**Table S2:** List of candidate volatiles putatively identified (MSI level 2) and matched across two different cohorts. Nine of out 17 metabolites listed were selected for further analysis since they had acceptable retention time drift between the two sets of experiments.

| Putative identification         | Mass   | Retention time (min) (discovery) | Retention time (min) (validation) | Retention time (min) difference | Comments  |
|---------------------------------|--------|----------------------------------|-----------------------------------|---------------------------------|-----------|
| 3,4-dihydroxy mandelic acid     | 184.15 | 20.87                            | Not found                         | n/a                             | Not found |
| Artemisinic acid                | 234.34 | 12.97                            | 12.83                             | 0.14                            | Included  |
| Cyclohexasiloxane, dodecamethyl | 357.57 | 16.47                            | 16.06                             | 0.41                            | Excluded  |
| Cyclohexylcyclohexane           | 357.57 | 15.36                            | 14.71                             | 0.65                            | Excluded  |
| Dodecane                        | 170.34 | 13.20                            | 13.27                             | -0.07                           | Included  |
| Eicosane                        | 282.56 | 20.65                            | 20.62                             | 0.03                            | Included  |
| Gallic acid ethyl ester         | 198.17 | 11.40                            | 10.99                             | 0.41                            | Excluded  |
| Glutamine                       | 128.09 | 21.73                            | 21.09                             | 0.64                            | Excluded  |
| Hexyl acetate                   | 170.34 | 11.70                            | 11.53                             | 0.16                            | Included  |
| Hippuric acid                   | 179.17 | 20.61                            | 20.52                             | 0.09                            | Included  |
| Neobietic acid                  | 302.46 | 21.66                            | Not found                         | n/a                             | Not found |
| Octacosane                      | 394.77 | 17.49                            | 17.46                             | 0.03                            | Included  |
| Octadecanal                     | 170.34 | 20.87                            | 20.75                             | 0.12                            | Included  |
| Octanal                         | 244.38 | 11.58                            | 11.32                             | 0.26                            | Included  |
| Perillic aldehyde               | 150.22 | 11.82                            | 11.66                             | 0.15                            | Included  |
| Proline                         | 115.13 | 14.27                            | 13.77                             | 0.50                            | Excluded  |
| Tetracosane                     | 338.65 | 18.17                            | Not found                         | n/a                             | Not found |

**Table S3:** Various standards used to create chemical mixtures that were spiked on gauze containing human sebum, were made by dissolving them in appropriate solvents. The table shows solvents in which each of these standards were individually created, before forming mixtures at various concentrations used for validation of smell by the Super Smeller.

| Standard                        | Solvent         |
|---------------------------------|-----------------|
| 3,4-dihydroxy mandelic acid     | Water           |
| Cyclohexasiloxane, dodecamethyl | Methanol        |
| Cyclohexylcyclohexane           | Methanol        |
| Diglycerol                      | Water           |
| Dodecane                        | Ethanol         |
| Eicosane                        | Acetone         |
| Gallic acid ethyl ester         | Water           |
| Glutamine                       | Water           |
| Hexyl acetate                   | MeOH            |
| Hippuric Acid                   | Water           |
| Hydroxymyristic acid            | Dichloromethane |
| Octacosane                      | Chloroform      |
| Octanal                         | Methanol        |
| Perillic aldehyde               | Water           |
| Proline                         | Water           |

**Table S4:** Classification approaches attempted to distinguish between drug naïve PD participants and PD participants on medication did not show a very clear classification between the two groups in discovery cohort and validation cohort. *K*-nearest neighbours, random forest and support vector machines (SVM) classification algorithms were used. Using random sampling repeated 10 times, 60% data were used for training set and remaining data were used to test the model. Area under the curve (AUC) and averaged classification accuracy (ACA) for each model are shown.

| Method               | Discovery cohort |     | Validation cohort |     |
|----------------------|------------------|-----|-------------------|-----|
|                      | AUC              | ACA | AUC               | ACA |
| <b>kNN</b>           | 78%              | 61% | 57%               | 42% |
| <b>SVM</b>           | 65%              | 60% | 60%               | 35% |
| <b>Random Forest</b> | 66%              | 61% | 54%               | 38% |

**Table S5:** List of participants' anonymized ID along with time since they were diagnosed with Parkinson's as of the date of recruitment to this study. Median time since diagnosis for those in Drug Naïve group was 0 year whereas those in Medication group was 3 years.

| ID         | Year of diagnosis | Group      | Time since diagnosis (years) when recruited |
|------------|-------------------|------------|---------------------------------------------|
| 210717_005 | 2017              | Drug Naïve | 0                                           |
| 210717_006 | 2017              | Drug Naïve | 0                                           |
| 210717_016 | 2013              | Drug Naïve | 4                                           |
| 210717_019 | 2017              | Drug Naïve | 0                                           |
| 210717_022 | 2016              | Drug Naïve | 1                                           |
| 210717_023 | 2015              | Drug Naïve | 2                                           |
| 210717_025 | 2017              | Drug Naïve | 0                                           |
| 210717_028 | 2013              | Drug Naïve | 4                                           |
| 210717_030 | 2016              | Drug Naïve | 1                                           |
| 210717_033 | 2017              | Drug Naïve | 0                                           |
| 210717_038 | 2015              | Drug Naïve | 2                                           |
| 181017_009 | 2017              | Drug Naïve | 0                                           |
| 181017_016 | 2017              | Drug Naïve | 0                                           |
| 181017_019 | 2017              | Drug Naïve | 0                                           |
| 181017_020 | 2005              | Drug Naïve | 12                                          |
| 181017_021 | 2017              | Drug Naïve | 0                                           |
| 181017_023 | 2017              | Drug Naïve | 0                                           |
| 181017_024 | 2016              | Drug Naïve | 1                                           |
| 191017_003 | 2016              | Drug Naïve | 1                                           |
| 191017_004 | 2017              | Drug Naïve | 0                                           |
| 191017_007 | 2015              | Drug Naïve | 2                                           |
| 181017_004 | 2002              | Medication | 15                                          |
| 181017_005 | 2016              | Medication | 1                                           |
| 181017_006 | 2014              | Medication | 3                                           |
| 181017_010 | 2016              | Medication | 1                                           |
| 181017_012 | 2016              | Medication | 1                                           |
| 181017_013 | 2013              | Medication | 4                                           |
| 181017_018 | 2013              | Medication | 4                                           |
| 191017_006 | 2007              | Medication | 10                                          |
| 191017_008 | 2015              | Medication | 2                                           |
| 191017_009 | 2014              | Medication | 3                                           |

|            |      |            |    |
|------------|------|------------|----|
| 210717_009 | 2014 | Medication | 3  |
| 210717_012 | 2016 | Medication | 1  |
| 210717_018 | 2014 | Medication | 3  |
| 210717_029 | 2014 | Medication | 3  |
| 210717_031 | 2015 | Medication | 2  |
| 210717_032 | 2015 | Medication | 2  |
| 210717_034 | 2017 | Medication | 0  |
| 210717_035 | 2014 | Medication | 3  |
| 210717_037 | 2004 | Medication | 13 |

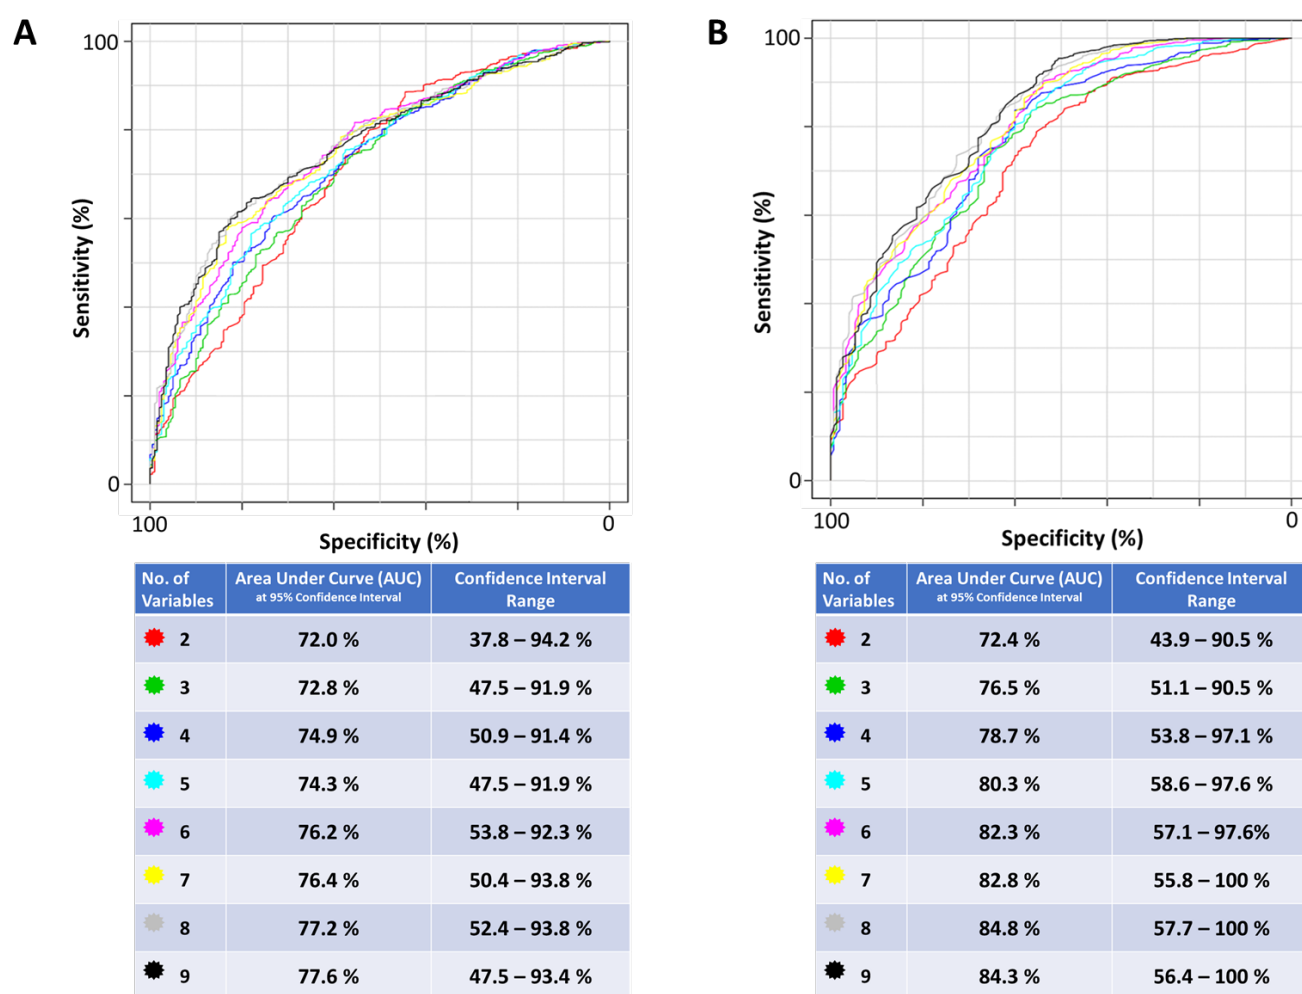

**Figure S1:** ROC plots generated using all nine metabolites that were common between the two cohorts (A discovery and B validation) (but not necessarily differential using Student's t-test or expressed in the same direction between cohorts). Each model was built using PLS-DA to rank all variables and top two important variables were selected to start with. Then in each subsequent model additional variables by rank were added to generate ROC curve. Confidence intervals were

calculated by Monte Carlo Cross Validation (MCCV) using balanced sub-sampling with multiple repeats.

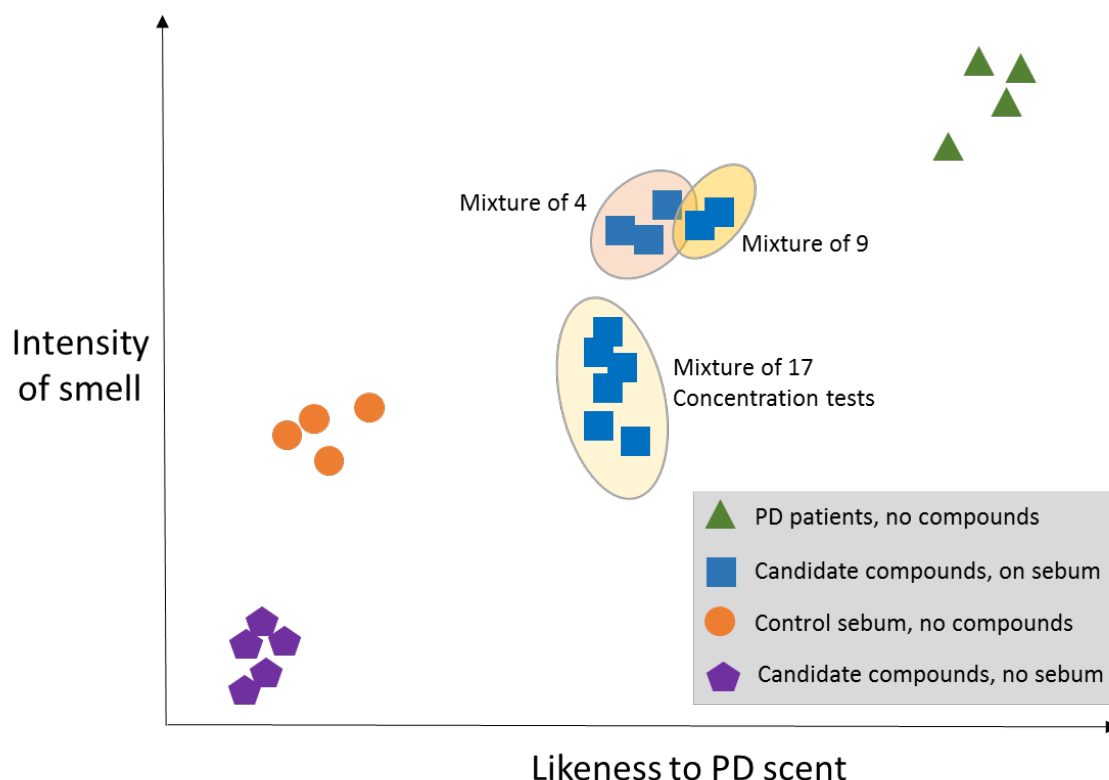

**Figure S2:** Schematic to show qualitatively the results of a series of blind randomised studies performed by the Super Smeller to classify and score samples based on their similarity to the 'PD smell' and their overall intensity of smell, these scores were defined by both oral and physical denomination by the Super Smeller. All samples were presented on gauze swabs; **purple** pentagons display a cluster of swabs of multiple combinations of candidate compounds spiked onto blank gauze (no sebum), **orange** circles show gauze swabs containing only human control sebum (no compounds), **blue** squares depict three series of compound combinations based on MS analysis spiked on to control sebum and **green** triangles represent clinical gauze samples swabbed from PD patients.
